# Supplementary material for: Evaluation of the effectiveness of the SurePure Turbulator ultraviolet-C irradiation equipment on inactivation of different enveloped and non-enveloped viruses inoculated in commercially collected liquid animal plasma
Source: PubMed Central journal article supplement (PMC6383881; doi:10.1371/journal.pone.0212332), 2019-02-21
Supplement: pone.0212332.s001.pdf [file pone.0212332.s001.pdf]

**S1 Table 1. PRV, PRRSV and PEDV titration results for each triplicate at each time/dose.** Dose was calculated as a UV-fluence received per unit of time. These data were used for GlnaFIT analysis.

| PRV        |            |          |
|------------|------------|----------|
| DOSE (J/L) | TIME (min) | Log10/mL |
| 0          | 0.00       | 4.53     |
| 0          | 0.00       | 4.53     |
| 0          | 0.00       | 4.53     |
| 750        | 3.52       | 3.46     |
| 750        | 3.52       | 3.95     |
| 750        | 3.52       | 3.94     |
| 1500       | 7.39       | 1.37     |
| 1500       | 7.39       | 1.35     |
| 1500       | 7.39       | 1.35     |
| 3000       | 15.06      | -1.69    |
| 3000       | 15.06      | -1.69    |
| 3000       | 15.06      | -1.69    |
| 6000       | 29.48      | -1.69    |
| 6000       | 29.48      | -1.69    |
| 6000       | 29.48      | -1.69    |
| 9000       | 44.07      | -1.69    |
| 9000       | 44.07      | -1.69    |
| 9000       | 44.07      | -1.69    |

| PRRSV      |            |          |
|------------|------------|----------|
| DOSE (J/L) | TIME (min) | Log10/mL |
| 0          | 0.00       | 4.07     |
| 0          | 0.00       | 3.89     |
| 0          | 0.00       | 4.06     |
| 750        | 3.52       | 1.47     |
| 750        | 3.52       | 1.03     |
| 750        | 3.52       | 1.50     |
| 1500       | 7.39       | -1.69    |
| 1500       | 7.39       | -1.69    |
| 1500       | 7.39       | -1.69    |
| 3000       | 15.06      | -1.69    |
| 3000       | 15.06      | -1.69    |
| 3000       | 15.06      | -1.69    |
| 6000       | 29.48      | -1.69    |
| 6000       | 29.48      | -1.69    |
| 6000       | 29.48      | -1.69    |
| 9000       | 44.07      | -1.69    |
| 9000       | 44.07      | -1.69    |
| 9000       | 44.07      | -1.69    |

| PEDV       |            |          |
|------------|------------|----------|
| DOSE (J/L) | TIME (min) | Log10/mL |
| 0          | 0.00       | 4.01     |
| 0          | 0.00       | 4.01     |
| 0          | 0.00       | 4.20     |
| 750        | 3.54       | 2.30     |
| 750        | 3.54       | 2.17     |
| 750        | 3.54       | 1.70     |
| 1500       | 7.45       | 1.12     |
| 1500       | 7.45       | 1.24     |
| 1500       | 7.45       | 1.22     |
| 3000       | 15.24      | -1.69    |
| 3000       | 15.24      | -1.69    |
| 3000       | 15.24      | -1.69    |
| 6000       | 30.35      | -1.69    |
| 6000       | 30.35      | -1.69    |
| 6000       | 30.35      | -1.69    |
| 9000       | 45.35      | -1.69    |
| 9000       | 45.35      | -1.69    |
| 9000       | 45.35      | -1.69    |
