# Supplementary material for: Evaluation of the effectiveness of the SurePure Turbulator ultraviolet-C irradiation equipment on inactivation of different enveloped and non-enveloped viruses inoculated in commercially collected liquid animal plasma
Source: PubMed Central journal article supplement (PMC6383881; doi:10.1371/journal.pone.0212332), 2019-02-21
Supplement: pone.0212332.s002.pdf [file pone.0212332.s002.pdf]

**S2 Table 2. BVDV, CSFV and SIV titration results for each triplicate at each time/dose.** Dose was calculated as a UV-fluence received per unit of time. These data were used for GlnaFIT analysis.

| BVDV       |            |          |
|------------|------------|----------|
| DOSE (J/L) | TIME (min) | Log10/mL |
| 0          | 0.00       | 3.94     |
| 0          | 0.00       | 4.12     |
| 0          | 0.00       | 4.43     |
| 750        | 3.51       | 3.25     |
| 750        | 3.51       | 3.50     |
| 750        | 3.51       | 3.35     |
| 1500       | 7.34       | 1.57     |
| 1500       | 7.34       | 1.61     |
| 1500       | 7.34       | 1.72     |
| 3000       | 14.52      | -2.69    |
| 3000       | 14.52      | -2.69    |
| 3000       | 14.52      | -2.69    |
| 6000       | 29.11      | -2.69    |
| 6000       | 29.11      | -2.69    |
| 6000       | 29.11      | -2.69    |
| 9000       | 43.04      | -2.69    |
| 9000       | 43.04      | -2.69    |
| 9000       | 43.04      | -2.69    |

| CSFV       |            |          |
|------------|------------|----------|
| DOSE (J/L) | TIME (min) | Log10/mL |
| 0          | 0.00       | 4.08     |
| 0          | 0.00       | 4.12     |
| 0          | 0.00       | 4.08     |
| 750        | 3.52       | 3.38     |
| 750        | 3.52       | 3.16     |
| 750        | 3.52       | 3.16     |
| 1500       | 7.39       | 0.64     |
| 1500       | 7.39       | 0.61     |
| 1500       | 7.39       | 0.66     |
| 3000       | 15.06      | -1.69    |
| 3000       | 15.06      | -1.69    |
| 3000       | 15.06      | -1.69    |
| 6000       | 29.48      | -1.69    |
| 6000       | 29.48      | -1.69    |
| 6000       | 29.48      | -1.69    |
| 9000       | 44.07      | -1.69    |
| 9000       | 44.07      | -1.69    |
| 9000       | 44.07      | -1.69    |

| SIV        |            |          |
|------------|------------|----------|
| DOSE (J/L) | TIME (min) | Log10/mL |
| 0          | 0.00       | 5.05     |
| 0          | 0.00       | 5.14     |
| 0          | 0.00       | 5.08     |
| 750        | 3.53       | 4.01     |
| 750        | 3.53       | 4.06     |
| 750        | 3.53       | 4.11     |
| 1500       | 7.37       | 1.61     |
| 1500       | 7.37       | 1.63     |
| 1500       | 7.37       | 1.72     |
| 3000       | 14.53      | -1.69    |
| 3000       | 14.53      | -1.69    |
| 3000       | 14.53      | -1.69    |
| 6000       | 29.06      | -1.69    |
| 6000       | 29.06      | -1.69    |
| 6000       | 29.06      | -1.69    |
| 9000       | 42.39      | -1.69    |
| 9000       | 42.39      | -1.69    |
| 9000       | 42.39      | -1.69    |
