# Supplementary material for: Evaluation of the effectiveness of the SurePure Turbulator ultraviolet-C irradiation equipment on inactivation of different enveloped and non-enveloped viruses inoculated in commercially collected liquid animal plasma
Source: PubMed Central journal article supplement (PMC6383881; doi:10.1371/journal.pone.0212332), 2019-02-21
Supplement: pone.0212332.s003.pdf [file pone.0212332.s003.pdf]

**S3 Table 3. PPV, SVDV and PCV-2 titration results for each triplicate at each time/dose.** Dose was calculated as a UV-fluence received per unit of time. These data were used for GlnaFIT analysis.

| PPV        |            |          |
|------------|------------|----------|
| DOSE (J/L) | TIME (min) | Log10/mL |
| 0.00       | 0.00       | 4.02     |
| 0.00       | 0.00       | 3.93     |
| 0.00       | 0.00       | 4.05     |
| 750.00     | 3.52       | 3.37     |
| 750.00     | 3.52       | 3.16     |
| 750.00     | 3.52       | 3.16     |
| 1500.00    | 7.39       | 1.70     |
| 1500.00    | 7.39       | 1.65     |
| 1500.00    | 7.39       | 1.72     |
| 3000.00    | 15.06      | -1.69    |
| 3000.00    | 15.06      | -1.69    |
| 3000.00    | 15.06      | -1.69    |
| 6000.00    | 29.48      | -1.69    |
| 6000.00    | 29.48      | -1.69    |
| 6000.00    | 29.48      | -1.69    |
| 9000.00    | 44.07      | -1.69    |
| 9000.00    | 44.07      | -1.69    |
| 9000.00    | 44.07      | -1.69    |

| SVDV       |            |          |
|------------|------------|----------|
| DOSE (J/L) | TIME (min) | Log10/mL |
| 0          | 0.00       | 4.08     |
| 0          | 0.00       | 4.08     |
| 0          | 0.00       | 4.08     |
| 750        | 3.52       | 4.10     |
| 750        | 3.52       | 4.03     |
| 750        | 3.52       | 4.11     |
| 1500       | 7.39       | 1.70     |
| 1500       | 7.39       | 1.65     |
| 1500       | 7.39       | 1.72     |
| 3000       | 15.06      | 1.48     |
| 3000       | 15.06      | 1.46     |
| 3000       | 15.06      | 1.46     |
| 6000       | 29.48      | -1.69    |
| 6000       | 29.48      | -1.69    |
| 6000       | 29.48      | -1.69    |
| 9000       | 44.07      | -1.39    |
| 9000       | 44.07      | -1.39    |
| 9000       | 44.07      | -1.39    |

| PCV-2      |            |          |
|------------|------------|----------|
| DOSE (J/L) | TIME (min) | Log10/mL |
| 0          | 0.00       | 3.32     |
| 0          | 0.00       | 3.12     |
| 0          | 0.00       | 3.33     |
| 750        | 3.51       | 1.67     |
| 750        | 3.51       | 1.64     |
| 750        | 3.51       | 1.73     |
| 1500       | 7.34       | 1.58     |
| 1500       | 7.34       | 1.49     |
| 1500       | 7.34       | 1.55     |
| 3000       | 14.52      | 1.49     |
| 3000       | 14.52      | 1.47     |
| 3000       | 14.52      | 1.49     |
| 6000       | 29.11      | 0.78     |
| 6000       | 29.11      | 0.72     |
| 6000       | 29.11      | 0.69     |
| 9000       | 43.04      | 0.56     |
| 9000       | 43.04      | 0.55     |
| 9000       | 43.04      | 0.53     |
